# Supplementary material for: Silicon nanowires decorated with gold nanoparticles via in situ reduction for photoacoustic imaging-guided photothermal cancer therapy
Source: Royal Society of Chemistry journal article supplement (doi:10.1039/c9tb00147f), 2019-01-01
Supplement: c9tb00147f1.pdf [file c9tb00147f1.pdf]

## Supporting Information

**Silicon Nanowires Decorated with Gold Nanoparticles via *In-Situ* Reduction for  
Photoacoustic Imaging-guided Photothermal Cancer Therapy**

Lina Sun, Ying Chen, Fei Gong, Qian Dang, Guangzhen Xiang, Liang Cheng\*,

Fan Liao, and Mingwang Shao\*

Institute of Functional Nano & Soft Materials (FUNSOM), Jiangsu Key Laboratory  
for Carbon-Based Functional Materials and Devices, Soochow University,  
Suzhou 215123, China.

\*Email: [lcheng2@suda.edu.cn](mailto:lcheng2@suda.edu.cn); [mwshao@suda.edu.cn](mailto:mwshao@suda.edu.cn)

## 1. Calculation of the photothermal conversion efficiency

Following Roper's report, the total energy balance for the system can be expressed by

Eq. 1:

$$\sum_i m_i C_{p,i} \frac{dT}{dt} = Q_{NC} + Q_{Dis} - Q_{Surr} \quad (1),$$

where  $m$  and  $C_p$  are the mass and heat capacity of water, respectively,  $T$  is the solution temperature,  $Q_{NC}$  is the energy inputted by NCs,  $Q_{Dis}$  is the baseline energy inputted by the sample cell, and  $Q_{Surr}$  is heat conduction away from the system surface by air.

The laser-induced source term, represents heat dissipated by electron-phonon relaxation of the plasmons on SiNWs-AuNPs surface under the irradiation of 1064 nm laser:

$$Q_{NC} = I(1 - 10^{-A_{1064}})\eta \quad (2),$$

where  $I$  is incident laser power,  $\eta$  is the conversion efficiency from incident laser energy to thermal energy, and  $A_{1064}$  is the absorbance of the SiNWs-AuNPs at wavelength of 1064 nm. In addition, source term,  $Q_{Dis}$ , expresses heat dissipated from light absorbed by the quartz sample cell itself, and it was measured independently to be 10.9 mW using a quartz cuvette cell containing pure water without a SiNWs-AuNPs. Furthermore,  $Q_{Surr}$  is linear with temperature for the outgoing thermal energy, as given by Eq. 3:

$$Q_{Surr} = hs(T - T_{Surr}) \quad (3),$$

where  $h$  is heat transfer coefficient,  $s$  is the surface area of the container, and  $T_{\text{Surr}}$  is ambient temperature of the surroundings.

Once the laser power is defined, the heat input ( $Q_{\text{NC}} + Q_{\text{Dis}}$ ) will be finite. Since the heat output ( $Q_{\text{Surr}}$ ) is increased along with the increase of the temperature according to the Eq. 3, the system temperature will rise to a maximum when the heat input is equal to heat output:

$$Q_{\text{NC}} + Q_{\text{Dis}} = Q_{\text{Surr-Max}} = hs(T_{\text{Max}} - T_{\text{Surr}}) \quad (4),$$

where the  $Q_{\text{Surr-Max}}$  is heat conduction away from the system surface by air when the sample cell reaches the equilibrium temperature, and  $T_{\text{max}}$  is the equilibrium temperature. The 1064 nm laser heat conversion efficiency ( $\eta$ ) can be determined by substituting Eq. 2 for  $Q_{\text{NC}}$  into Eq. 4 and rearranging to get

$$\eta = \frac{hs(T_{\text{Max}} - T_{\text{Surr}}) - Q_{\text{Dis}}}{I(1 - 10^{-A_{1064}})} \quad (5),$$

where  $Q_{\text{Dis}}$  was measured independently to be 10.9 mW, the  $(T_{\text{max}} - T_{\text{Surr}})$  was 21.6 °C according to Figure 3g,  $I$  is 1.0 mW/cm<sup>2</sup>,  $A_{1064}$  is the absorbance (0.46949) of SiNWs-AuNPs at 1064 nm (Figure S3a). Thus, only the  $hs$  remains unknown for calculating  $\eta$ . In order to get the  $hs$ , a dimensionless driving force temperature,  $\theta$  is introduced using the maximum system temperature,  $T_{\text{max}}$

$$\theta = \frac{T - T_{\text{Surr}}}{T_{\text{Max}} - T_{\text{Surr}}} \quad (6),$$

and a sample system time constant  $\tau_s$

$$\tau_s = \frac{\sum_i m_i C_{p,i}}{hs} \quad (7),$$

which is substituted into Eq. 1 and rearranged to yield

$$\frac{d\theta}{dt} = \frac{1}{\tau_s} \left[ \frac{Q_{NC} + Q_{Dis}}{hs(T_{Max} - T_{Surr})} - \theta \right] \quad (8),$$

At the cooling stage of the aqueous dispersion of the SiNWs-AuNPs, the light source was shut off, the  $Q_{NC} + Q_{Dis} = 0$ , reducing the Eq. 9

$$dt = -\tau_s \frac{d\theta}{\theta} \quad (9),$$

and integrating, giving the expression

$$t = -\tau_s \ln\theta \quad (10),$$

Therefore, time constant for heat transfer from the system is determined to be  $\tau_s = 265.8$  s by applying the linear time data from the cooling period (after 600 s) vs negative natural logarithm of driving force temperature (Figure 3h). In addition, the  $m$  is 0.5 g and the  $C$  is 4.2 J/g. Thus, according to Eq. 7, the  $hs$  is deduced to be 7.7 mW/°C. Substituting 7.7 mW/°C of the  $hs$  into Eq. 5, the 1064 nm laser heat conversion efficiency ( $\eta$ ) of SiNWs-AuNPs can be calculated to be 24.1%. The calculation method of the photothermal conversion efficiency of pure SiNWs suspensions was similar to the one of SiNWs-AuNPs and the efficiency of pure SiNWs was 12.2% (Figure S4).

## 2. Supporting Figures

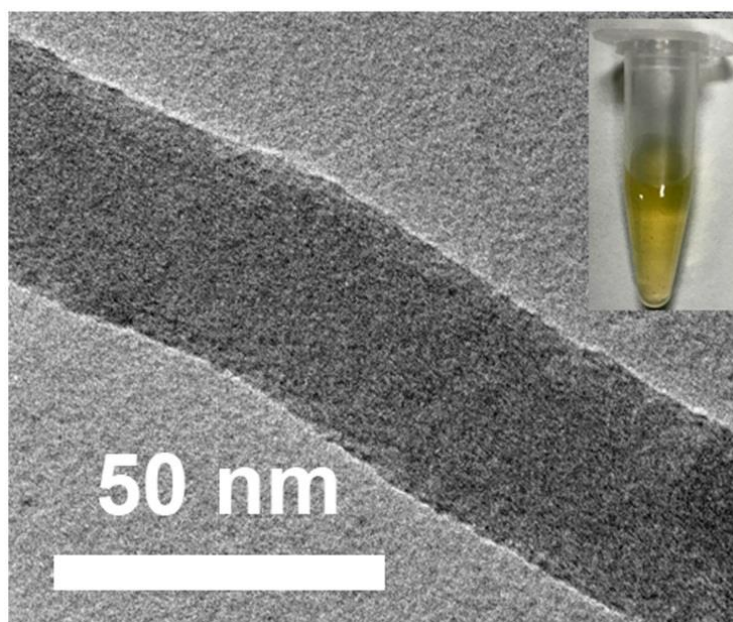

**Figure S1.** TEM image of a pristine SiNW, the insert image being the appearance of SiNW dispersion.

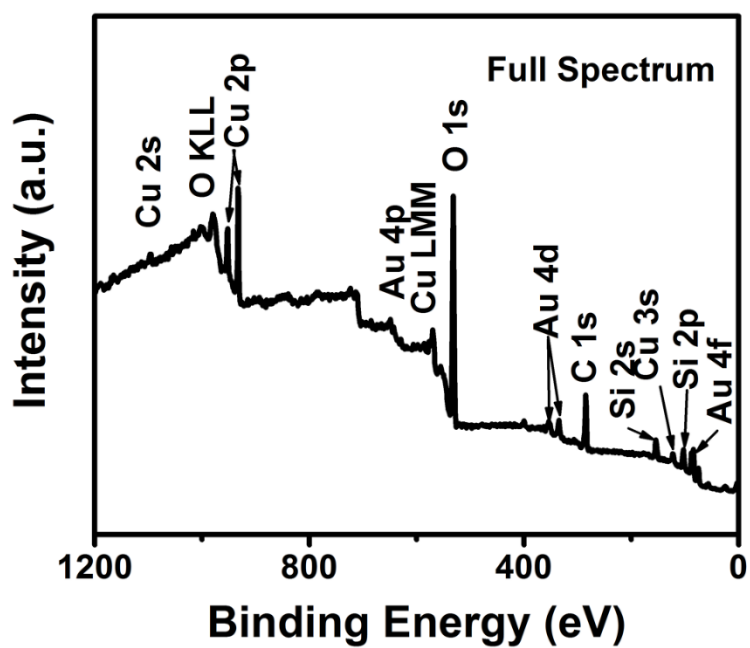

**Figure S2.** XPS full spectrum of SiNWs-AuNPs (copper sheets as substrates).

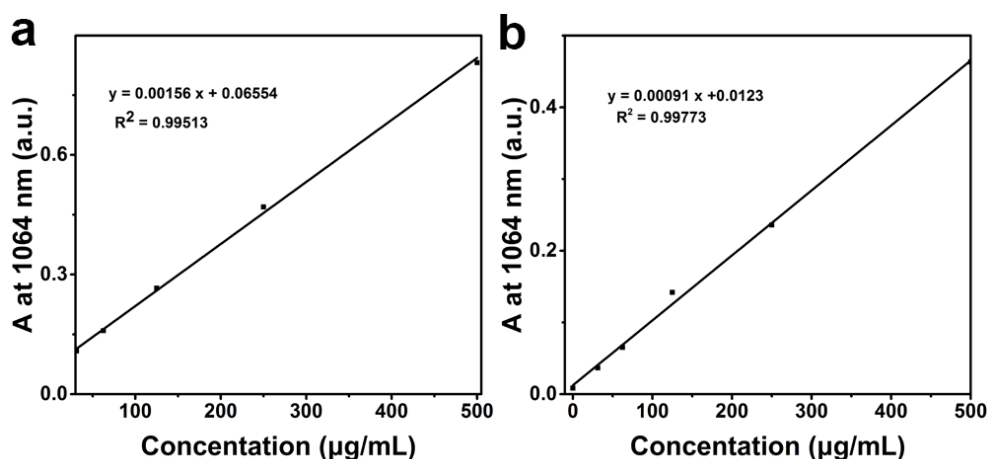

**Figure S3.** Normalized absorbance intensity with different concentrations at 1064 nm of (a) TA-SiNWs-AuNPs and (b) pure SiNWs suspensions (A means absorbance).

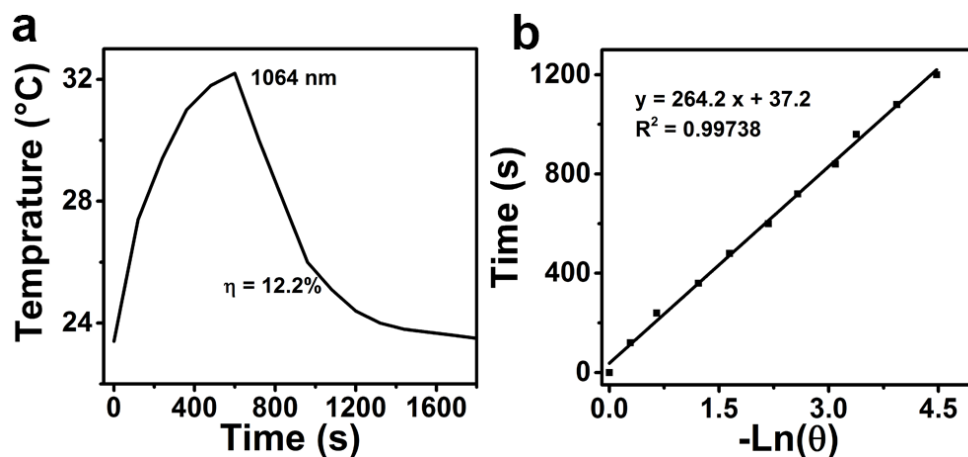

**Figure S4.** (a) Temperature profile of pure SiNWs suspensions (300 µg/mL) irradiated by 1064 nm laser (1.0 W/cm<sup>2</sup>) for 10 min followed by natural cooling with the laser turned off; and (b) Measuring the time constant for heat transfer from the system using a linear regression of cooling profile.

**Table S1.** Photothermal performance of reported PTAs in the NIR-II region

| PTAs                                                 | Con ( $\mu\text{g/mL}$ ) | Power ( $\text{W/cm}^2$ ) | $\Delta T$ ( $^{\circ}\text{C}$ ) | PTCE  | Refs                                |
|------------------------------------------------------|--------------------------|---------------------------|-----------------------------------|-------|-------------------------------------|
| Ultrathin PPy Nanosheets                             | 100                      | 1                         | 40.2                              | 64.6% | Nano Letters. 2018, 18, 2217        |
| PEGylated $\text{Cu}_3\text{BiS}_3$ Nanorods         | 150                      | 1                         | 27                                | 40.7% | Biomaterials. 2017, 112, 164.       |
| Au@ $\text{Cu}_{2-x}\text{S}$ Nanocrystals           | 200                      | 0.7                       | 20.5                              | 43.3% | Adv. Mater. 2016, 28, 3094.         |
| Au- $\text{Cu}_9\text{S}_5$ Nanoparticles            | 50                       | 0.7                       | 19.6                              | 37%   | J. Am. Chem. Soc. 2014, 136, 15684. |
| $\text{Fe}_3\text{O}_4$ @CuS-PEG Nanoparticles       | 300                      | 3                         | 22                                | 19.2% | Adv. Funct. Mater. 2015, 25, 6527.  |
| H- $\text{SiO}_x$ -PEG Nanoparticles                 | 36                       | 1                         | 23.5                              | 48.6% | Biomaterials. 2017, 143, 120.       |
| CoP-Nanocrystals                                     | 200                      | 0.8                       | 29.1                              | 21.2% | Small. 2017, 13, 1700798.           |
| Au Nanorod@PPy@ $\text{Fe}_x\text{O}$ Nanocomposites | 200                      | 1                         | 16.5                              | 46.0% | Nano Research. 2016, 9, 787.        |
| $\text{Fe}_3\text{O}_4$ Nanoclusters                 | 375                      | 0.38                      | 24                                | 20.8% | Nanoscale. 2015, 7, 12689.          |
| $(\text{NH}_4)_x\text{WO}_3$ Nanocubes               | 250                      | 1.4                       | 24.8                              | 39.4% | Biomaterials. 2015. 02. 054         |
| SiNWs-AuNPs                                          | 300                      | 1                         | 21.6                              | 24.1% | This work                           |
